# Supplementary material for: Escherichia colitemplated iron oxide biomineralization under oscillation
Source: Royal Society of Chemistry journal article supplement (doi:10.1039/d1ra00847a), 2021-01-01
Supplement: d1ra00847a1.pdf [file d1ra00847a1.pdf]

## *Escherichia coli* Templated Iron Oxide Biomineralization under Oscillation

Panpan He<sup>a</sup>, Junhui Guo<sup>a\*</sup>, Liwen Lei<sup>b</sup>, Jiafeng Jiang<sup>a</sup>, Qichang Li<sup>a</sup>, Zhiyi Hu<sup>b</sup>, Baolian Su<sup>bc</sup>, and Zhengyi Fu<sup>b\*</sup>, Hao Xie<sup>a\*</sup>

<sup>a</sup>School of Chemistry, Chemical Engineering and Life Sciences, Wuhan University of Technology, Wuhan, 430070, China. E-mail: guojunhui@whut.edu.cn (J.G.); h.xie@whut.edu.cn. (H.X.)

<sup>b</sup>State Key Laboratory of Advanced Technology for Materials Synthesis and Processing, Wuhan, 430070, China. E-mail: zyfu@whut.edu.cn. (Z.F.)

<sup>c</sup>Laboratory of Inorganic Materials Chemistry, University of Namur, B-5000 Namur, Belgium.

### Supporting Information

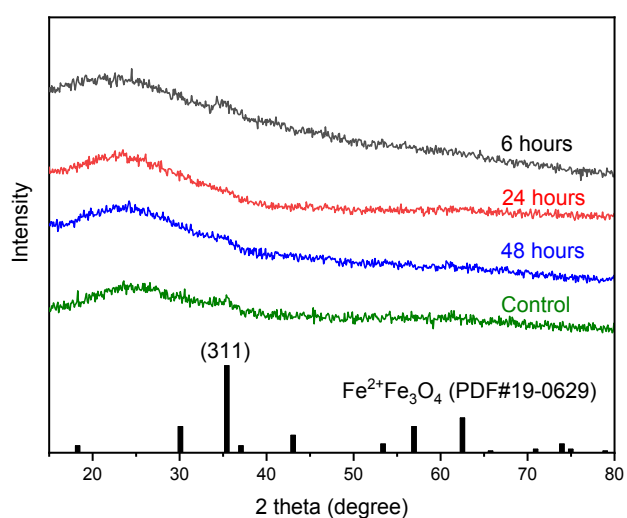

**Figure S1** XRD spectra of iron biominerals after mineralization for 6, 24, 48 hours. The control sample is biominerals acquired after 48 hours of mineralization without bacteria.

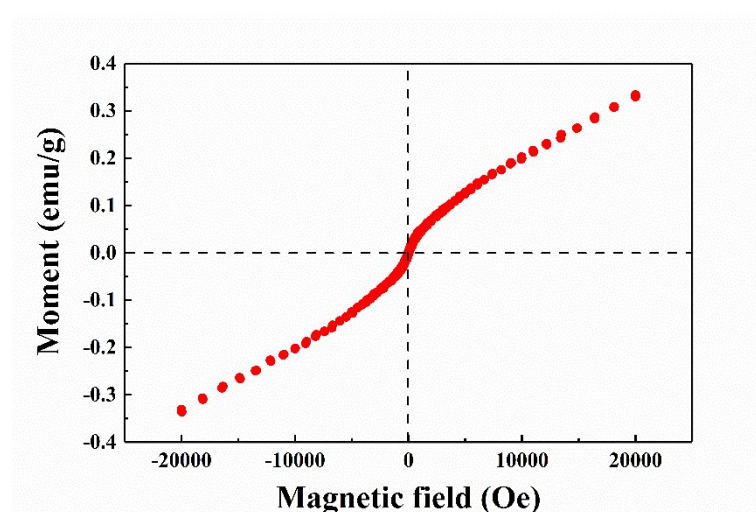

**Figure S2** Vibrating sample magnetometry of iron biominerals.

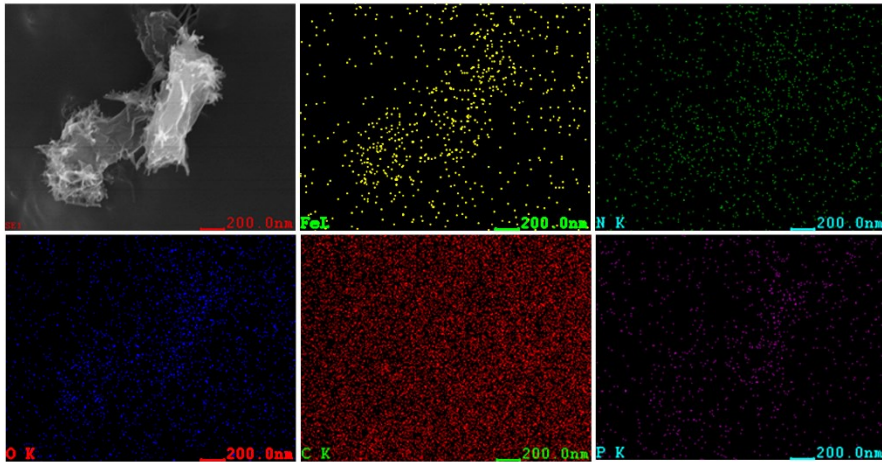

**Figure S3** Elemental analysis of minerals on bacterial surface. It shows HAADF-STEM image and corresponding EDX elemental maps of a *Bacillus subtilis* cell covering with biominerals.

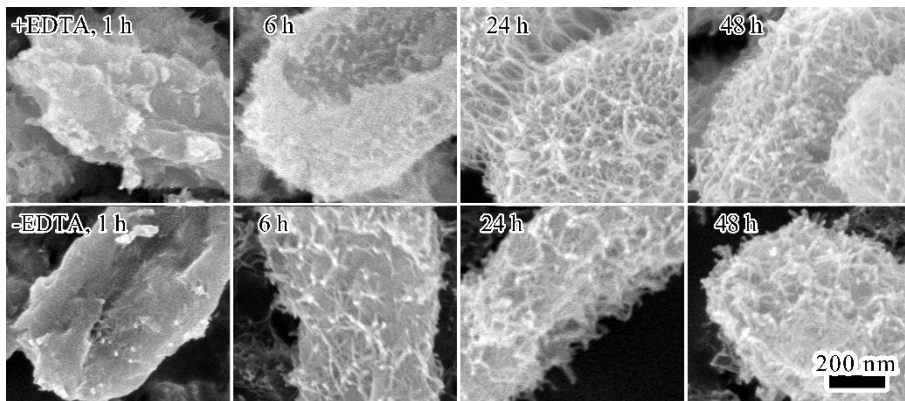

**Figure S4** SEM images of cells pretreating with lysozyme with or without EDTA after subjecting to mineralization for 1 hour, 6 hours, 24 hours, and 48 hours.

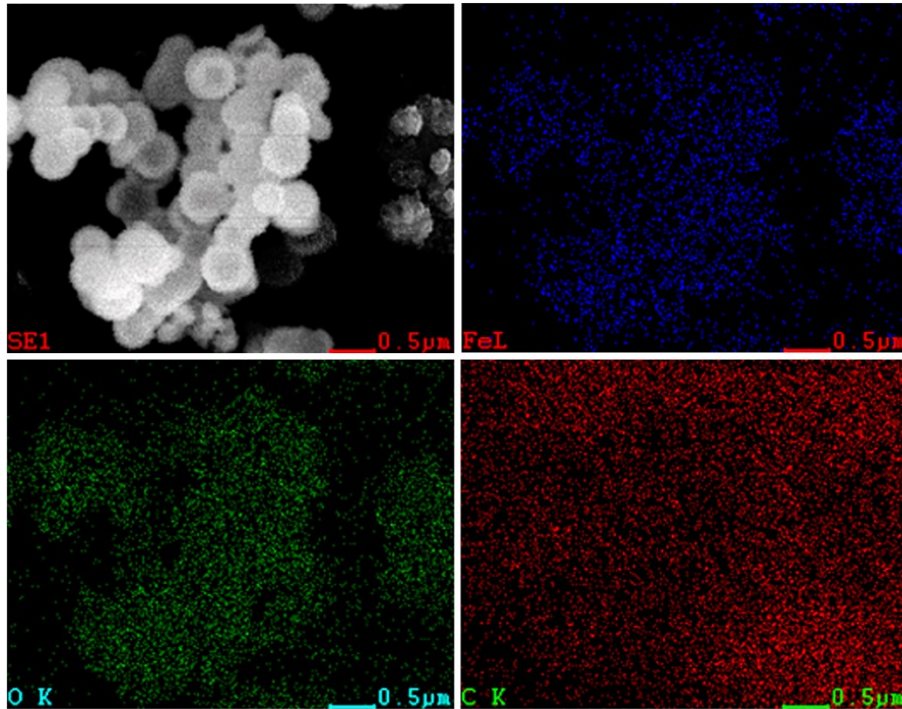

**Figure S5** Elemental analysis of minerals on liposomes. It shows HAADF-STEM image and corresponding EDX elemental maps of liposomes covering with minerals.

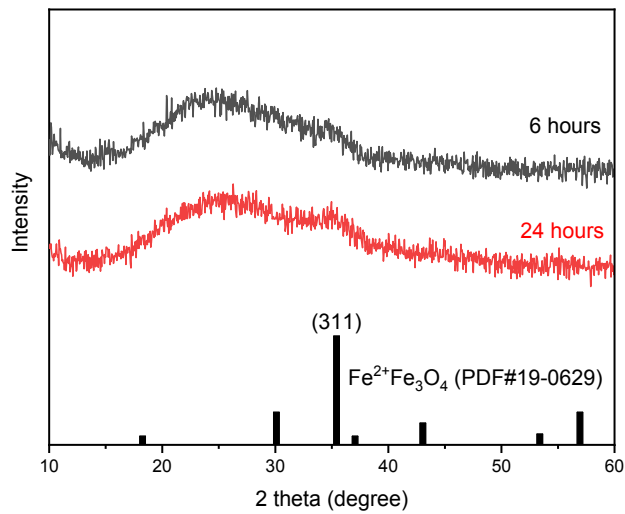

**Figure S6** Elemental analysis of minerals on liposomes. It shows HAADF-STEM image and corresponding EDX elemental maps of liposomes covering with minerals.

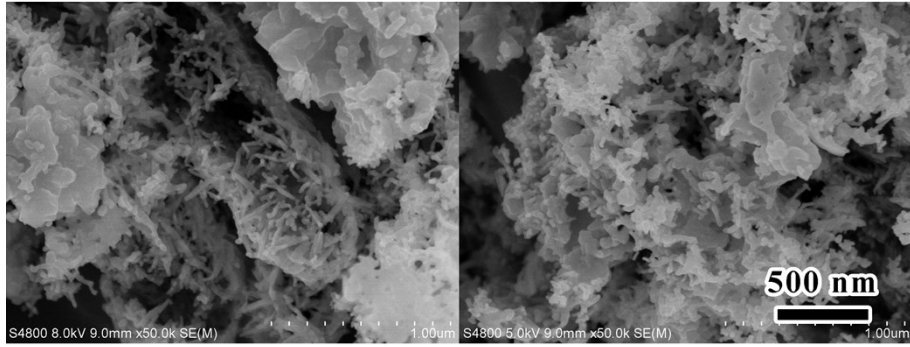

**Figure S7** SEM images of iron biomaterials after calcination at 700 °C for 4 hours.
